# Supplementary material
Source: MDPI journal article supplement (https://www.mdpi.com/1999-4907/14/5/906)
Supplement: s1 [file s1 › forests-2272770-supplementary.pdf]

## Supplementary Materials (I and 2)

Value chain data was collected from fuelwood harvesters, transporters, retailers, wholesalers, and non-licensed actors using structured questionnaires (**supplementary Material 1**) administered through face-to-face interviews, as well as organizing Focus Group Discussion (FGD) (**supplementary Materials**). The questionnaires contained both open-ended and close-ended questions that sought information on the following: (i) socio-demographic characteristics of the respondents, (ii) cost and sales information, (iii) preferred fuelwood tree species (iv) abundant and scarcely preferred tree species for fuelwood, (v) average monthly quantity of fuelwood handled, (vi) means of transporting fuelwood, (vii), method of sales of fuelwood and (viii) forms of fuelwood handled (e.g., logs, stumps cleaved, twigs, and scrap wood). The questionnaires were developed based on adapted questions from a previous study (Ndegwa, 2010) and information gathered during the preliminary study carried out in 2018. Prior to the actual survey, a pilot study was conducted to test the questionnaire to test the clarity of the question and other issues that were overlooked during the questionnaire development. In addition, the questionnaire was reviewed and endorsed by the Universiti Putra Malaysia's Research Ethics Committee in terms of ethical standards. The questionnaires used in this study are provided in the supplementary materials of this article.

## Questionnaire for Fuelwood Harvesters

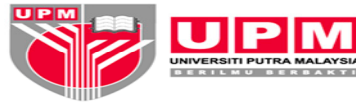

We are researchers from University Putra Malaysia (UPM) currently undertaking a study titled 'Analysis of fuelwood value chain in Yobe, Nigeria. Thus, we are soliciting for your time to respond to the attached questionnaire. The content of the questionnaire is centred on the below sub-themes:

- \_\_\_\_\_ A: Background
- \_\_\_\_\_ B: Structure and characteristics of fuelwood value chain
- \_\_\_\_\_ C: Cost (expenses)
- \_\_\_\_\_ D: Environmental aspects of fuelwood value chain
- \_\_\_\_\_ E: Problem faced, expected changes and interventions for sustainable fuelwood value chain practices

*(1) All information given will be treated confidential*

*(2) This interview is planned to last no longer than 40 minutes. During this time, you will be asked questions on subject matter that relates to your node in fuelwood value chain.*

*(3) Your participation in this research is voluntary and you may wish to withdraw at any time if you feel to do so.*

**Location:** \_\_\_\_\_

**Name:** \_\_\_\_\_

**Sign:** \_\_\_\_\_ **Date:**...../...../2019

**Thanks for your responses to our survey**

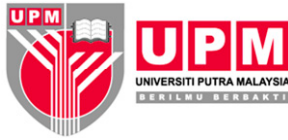

I am a PhD. Student from University Putra Malaysia (UPM) currently undertaking a study titled 'ANALYSIS OF FUELWOOD VALUE CHAIN IN YOBE STATE, NIGERIA'

. Therefore, soliciting for your support and time to respond to the attached questionnaire. The content of the questionnaire is centred on the below sub-themes:

\_\_\_\_\_ A Socio-demographic Background

\_\_\_\_\_ B: Structure and characteristics of fuelwood value chain

\_\_\_\_\_ C: Market analysis/cost

\_\_\_\_\_ D: Environmental aspects of fuelwood

\_\_\_\_\_ E: Problem faced, change expectations and interventions in fuelwood value chain

I therefore assure you that:

(1) All information given will be treated confidential

#### SECTION A: SOCIO-DEMOGRAPHIC PROFILE:

Name (Optional) \_\_\_\_\_

1. Gender: Male ☐ Female ☐

2. Marital status: Single ☐ Married ☐

3. Age: \_\_\_\_\_ years

4. Highest Education Level:

1. Tertiary (Dip/NCE/HND/Degree/Masters/PhD)

☐

2. Secondary (JCE/SSCE)

☐

3. Primary

☐

4. Non formal education

☐

5. Household size: \_\_\_\_\_ person(s)

6. Are you currently registered with any fuelwood association?

Yes ☐ No ☐

7. What is your status in your fuelwood business?

1. Self-employed ☐
2. Employee ☐

8. What is the status of your employment?

Full time ☐ Part time ☐ Seasonal ☐

9. If your status is a part time or seasonal, what is your main occupation? \_\_\_\_\_

10. How long have you been working as fuelwood collector/harvester? \_\_\_\_\_

11. Where do you currently live? \_\_\_\_\_ (name  
of the village and city)

12. On average, how much investment capital do you start with ₦ \_\_\_\_\_ and how much do you  
earn from this (fuelwood collection/harvesting) job?  
₦ \_\_\_\_\_/month

## SECTION B: STRUCTURE AND NODES OF FUELWOOD VALUE CHAIN

**13. From the following sources of fuelwood, please indicate your source of fuelwood**

- Urban forest (Trees within the town) ☐
- Bushes ☐
- Agroforestry farm ☐
- Buffer zones of forest Sanctuary ☐
- Communal forest or woodland ☐
- Forest reserve ☐
- Riverbanks ☐
- Hilly areas, ☐
- Valleys ☐
- Farmlands ☐
- Others, (Please specify) \_\_\_\_\_

**14. Of the above sources, which source do you prefer for fuelwood collection \_\_\_\_\_ and why?**

\_\_\_\_\_

**15. What quantity of fuelwood do you typically collect/harvest? \_\_\_\_\_ (Kg/ton/month)**

**16. Do you obtain a license/permit before harvesting trees for fuelwood?**

Yes ☐ How much is the permit fee ₦ \_\_\_\_\_ per month and from who? \_\_\_\_\_

No ☐ Why? \_\_\_\_\_

**17. Please indicate the types of your fuelwood business ownership**

Sole owner ☐ Family business ☐ Partnership ☐

Cooperative ☐

Other(s), please specify \_\_\_\_\_

**18. Do you employ worker/s? Yes ☐ No ☐**

**19. If yes what is the total number of permanent worker you have? \_\_\_\_\_**

**20. Describe how do you sell the extracted fuelwood? (e.g., roadside, village, city)**

\_\_\_\_\_

**21. How much do you sell?**

Sold at roadside ₦ \_\_\_\_\_

Sold at market ₦ \_\_\_\_\_ please state the location of the market \_\_\_\_\_

Sold at other place (Specify the amount and place) ₦ \_\_\_\_\_

**22. If you do not sell your fuelwood (e.g. at roadside or forest compartment), how do you transport the extracted fuelwood to the market?**

Own transport ☐

Hired transport ☐

Contracted transport ☐

**Others,** (Please specify) \_\_\_\_\_

**23. What type of transport do you own or usually hire/contract?**

Small size trucks (Pick up and Beijing Van) ☐

Medium size truck (Toyota Van and Mitsubishi) ☐

Big truck/Lorry ☐

Rickshaw (Tricycle) ☐

Camel ☐

Ox-Cart ☐

Wheelbarrow ☐

Bicycle ☐

Headload ☐

**Others** (Please specify) \_\_\_\_\_

**24. Do you vary fuelwood prices in terms of buyers?**

Yes ☐ No ☐

**25. Who sets the price for fuelwood?**

Harvesters ☐

Wholesaler ☐

Transporters ☐

Retailers ☐

Consumers ☐

**Others,** (Please specify) ☐

**26. In what form do you sell the extracted fuelwood?**

Bundles of twigs ☐

Stere of twigs ☐

Stere of cleaved woods ☐

Bundles of cleaved woods ☐

Stere of short Logs ☐

**Others** (Please specify) \_\_\_\_\_

**27. Which period is fuelwood more demanded?**

Dry season (November to March) ☐

Wet season (April to October) ☐

**28. Which period reflects a high price of fuelwood?**

Dry season (November to March) ☐

Wet season (April to October) ☐

**29. Who is/are your primary customer(s)?**

Households ☐

Institutions/small scale industries ☐

Transporters ☐

Retailers ☐

Wholesalers ☐

All ☐

**Others,** (Please specify) \_\_\_\_\_

### SECTION C: COST INFORMATION

30. List average monthly expenses related to your business?

| Types of Cost (please detail out each related cost) | ₦ | Per month/year | Purchase price<br>₦ | Year bought |
|-----------------------------------------------------|---|----------------|---------------------|-------------|
| <b>Variable cost</b>                                |   |                |                     |             |
| Rope                                                |   |                |                     |             |
| Royalty                                             |   |                |                     |             |
| Fees                                                |   |                |                     |             |
| Fuel                                                |   |                |                     |             |
| Illegal charges (if any)                            |   |                |                     |             |
| Maintenance and repair                              |   |                |                     |             |
| Self-Transport fee                                  |   |                |                     |             |
| Fuelwood Transport fee                              |   |                |                     |             |
| Labor)                                              |   |                |                     |             |
| Food                                                |   |                |                     |             |
| <b>Others,</b> (Please specify)                     |   |                |                     |             |
|                                                     |   |                |                     |             |
| <b>Fixed cost</b>                                   |   |                |                     |             |
| Rent                                                |   |                |                     |             |
| Tax                                                 |   |                |                     |             |
| Interest expense                                    |   |                |                     |             |
| Building lease expense                              |   |                |                     |             |
| Ax                                                  |   |                |                     |             |
| Digger                                              |   |                |                     |             |
| Mat                                                 |   |                |                     |             |
| Leather                                             |   |                |                     |             |
| Dishes and Pots                                     |   |                |                     |             |
| <b>Others,</b> (Please specify)                     |   |                |                     |             |
|                                                     |   |                |                     |             |

31. What is the selling price per truck/stere etc.? ₦ \_\_\_\_\_

**SECTION D: ENVIRONMENTAL ASPECTS OF  
FUELWOOD VALUE CHAIN (30-38)**

**32. How do you extract fuelwood?**

Manually (Hand collection method, Machete, Ax, Digger)

☐

Mechanically (Chainsaw)

☐

**Others**, (Please specify \_\_\_\_\_)

**33. What type of felling method do you employ in extracting/collecting fuelwood?**

Marking and felling selected whole trees

☐

Indiscriminate felling of whole trees

☐

Pruning (stem harvesting)

☐

Stump lifting

☐

Residual collection of (e.g. Construction,

☐

Agricultural activities)

☐

Coppicing

☐

**Others**, (Please specify \_\_\_\_\_)

**34. What form of trees do you harvest for fuelwood?**

Dead standing trees

☐

Diseased tree

☐

Dead fallen trees

☐

**Others**, (Please specify \_\_\_\_\_)

**35. What parts of the tree do you primarily collect/harvest as fuelwood?**

Logs

☐

Branch

☐

Stump

☐

**Others**, (Please specify \_\_\_\_\_)

**36. Is there any restriction on the type of tree species for fuelwood by the forest department?**

Yes

☐

No

☐

If yes, what are the names of those species \_\_\_\_\_?

37. Is there any restriction on the method of harvesting tree species for fuelwood by the forest department?

Yes

☐

No

☐

If yes, what are the names of those methods\_\_\_\_\_?

38. What are your feelings about the availability of fuelwood from its source?

\_\_\_\_\_

\_\_\_\_\_

Use the below abbreviations to complete column D of Table 1

|                   |                  |                  |                               |                            |                                  |
|-------------------|------------------|------------------|-------------------------------|----------------------------|----------------------------------|
| Plantation<br>(P) | Roadside<br>(RS) | Farmland<br>(FL) | Shelter<br>belt Tree<br>(SBT) | Forest<br>reserve<br>(AFT) | Communal<br>forest area<br>(CFA) |
|-------------------|------------------|------------------|-------------------------------|----------------------------|----------------------------------|

Table 1:

39. Please fill the information in the three columns of the table where applicable

| S/n   | A                         | B                     | C                                       | D                                                           | E                                        |
|-------|---------------------------|-----------------------|-----------------------------------------|-------------------------------------------------------------|------------------------------------------|
|       | Common/Local name (Hausa) | Botanical Name        | Types of Woods (Hard Wood or Soft Wood) | Mark (X) the preferred tree species for commercial fuelwood | Common place where tree species is found |
| i.    | Dakwara                   | Acacia Senegal        |                                         |                                                             |                                          |
| ii.   | Farar kaya                | Acacia seyal          |                                         |                                                             |                                          |
| iii.  | Bagaruwa                  | Acacia nilotica       |                                         |                                                             |                                          |
| iv.   | Gawo                      | Faidherbia albida     |                                         |                                                             |                                          |
| v.    | Kandili                   | Acacia tortilis       |                                         |                                                             |                                          |
| vi.   | Marke                     | Anogeissus leiocarpa  |                                         |                                                             |                                          |
| vii.  | Matsagi                   | Bauhinia rufescens    |                                         |                                                             |                                          |
| viii. | Aduwa                     | Balanites aegyptiaca  |                                         |                                                             |                                          |
| ix.   | Kurya                     | Bombax costatum       |                                         |                                                             |                                          |
| x.    | Kadanya                   | Vitellaria paradoxa   |                                         |                                                             |                                          |
| xi.   | Rimi                      | Ceiba pentandra       |                                         |                                                             |                                          |
| xii.  | Maje                      | Daniellia oliveri     |                                         |                                                             |                                          |
| xiii. | Taura                     | Deuterium microcarpum |                                         |                                                             |                                          |
| xiv.  | Kanya                     | Diospyros             |                                         |                                                             |                                          |

|        |                                  |                                        |  |  |  |
|--------|----------------------------------|----------------------------------------|--|--|--|
|        |                                  | <i>mespiliformis</i>                   |  |  |  |
| xv.    | Baure                            | <i>Ficus syscomorus</i>                |  |  |  |
| xvi.   | Dorowa                           | <i>Parkia biglo bosa</i>               |  |  |  |
| xvii.  | Kalgo                            | <i>Piliostigma<br/>reticulatum</i>     |  |  |  |
| xviii. | Kirya                            | <i>Prosopis africana</i>               |  |  |  |
| xix.   | Sanya                            | <i>Securidaca<br/>longepedunculata</i> |  |  |  |
| xx.    | Danya                            | <i>Sclerocarya birrea</i>              |  |  |  |
| xxi.   | Tsamiya                          | <i>Tamarindus indica</i>               |  |  |  |
| xxii.  | Dinya                            | <i>Vitex doniana</i>                   |  |  |  |
| xxiii. | Tsada                            | <i>Xmenia americana</i>                |  |  |  |
| xxiv.  | Magarya                          | <i>Ziziphus mauritiana</i>             |  |  |  |
| xxv.   | Kurna                            | <i>Ziziphus mucronata</i>              |  |  |  |
| xxvi.  | Any other<br>(Please<br>specify) |                                        |  |  |  |

40. Have you noticed any species that is difficult to obtain now compared to the previous period?

Yes

☐

No

☐

If yes, name the species \_\_\_\_\_ and why do you think this happen\_\_\_\_\_

41. Is the fuelwood supply from the source uniform over the years

Yes

☐

No

☐

If No; please why? \_\_\_\_\_ e.g. seasonality or demanded)

42. Do you make any tree-planting efforts in the forest, rural areas, or urban area?

Yes

☐

No

☐

If yes, Where? \_\_\_\_\_

If no, Why \_\_\_\_\_

**SECTION E: CHALLENGES AND INTERVENTION STRATEGIES(39-42)**

**43. What are your main challenges while undertaking your fuelwood business?**

i. \_\_\_\_\_

ii. \_\_\_\_\_

iii. \_\_\_\_\_

**44. What do you think should be done to improve the situation stated above?**

i. \_\_\_\_\_

ii. \_\_\_\_\_

iii. \_\_\_\_\_

**45. Do you get any support from the government?**

Yes

☐

No

☐

i. If yes, state the type of support?

\_\_\_\_\_

ii If no, why?

\_\_\_\_\_

**46. Do you get any support from any organization or institution?**

Yes

☐

No

☐

If yes, which organization/institution?

i \_\_\_\_\_

ii. What type of support? \_\_\_\_\_

**47. Are you willing to plant?**\_\_\_\_\_

**48. If yes, what assistance do you require if you are willing to plant a tree?**

\_\_\_\_\_

## Questionnaire for Fuelwood Transporters

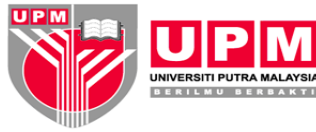

I am a PhD. Student from University Putra Malaysia (UPM) currently undertaking a study titled **'ANALYSIS OF FUELWOOD VALUE CHAIN IN YOBE STATE, NIGERIA'**

. Therefore, soliciting for your support and time to respond to the attached questionnaire. The content of the questionnaire is centred on the below sub-themes:

\_\_\_\_\_ A Socio-demographic Background

\_\_\_\_\_ B: Structure and characteristics of fuelwood value chain

\_\_\_\_\_ C: Market analysis/cost

\_\_\_\_\_ D: Environmental aspects of fuelwood

\_\_\_\_\_ E: Problem faced, change expectations and interventions in fuelwood value chain

**I therefore assure you that:**

*(1) All information given will be treated confidential*

## SECTION A: SOCIO-DEMOGRAPHIC PROFILE:

Name (Optional) \_\_\_\_\_

1. Gender:      Male                      ☐ Female                      ☐

2. Marital status: Single                      ☐ Married                      ☐

3. Age: \_\_\_\_\_ years

**4. Highest Education Level:**

- |                                              |                          |
|----------------------------------------------|--------------------------|
| 1. Tertiary (Dip/NCE/HND/Degree/Masters/PhD) | <input type="checkbox"/> |
| 2. Secondary (JCE/SSCE)                      | <input type="checkbox"/> |
| 3. Primary                                   | <input type="checkbox"/> |
| 4. No formal education                       |                          |

5. Household size: \_\_\_\_\_ person(s)

6. Are you currently registered with any fuelwood association?

Yes ☐                      No ☐

7. What is your status in the Transport node?

- |                                 |                          |
|---------------------------------|--------------------------|
| 1.      Hired/contracted Driver | <input type="checkbox"/> |
| 2.      Owner of truck          | <input type="checkbox"/> |

8. What is the status of your employment? Full time ☐

Part time ☐                      Seasonal ☐

9. If your status is a part time or seasonal, what is your main occupation? \_\_\_\_\_

10. How long have you been working as a transporter? \_\_\_\_\_

11. Where do you currently live? \_\_\_\_\_(name of village and city)

12. On average, how much investment capital do you start with ₦ \_\_\_\_\_ and how much do you earn from this (fuelwood collection/harvesting) job?

₦ \_\_\_\_\_/month

## SECTION B: STRUCTURE AND NODES OF FUELWOOD VALUE CHAIN

12. From the following sources of fuelwood, please indicate the fuelwood harvest/collection often source fuelwood or being contracted to haul fuelwood?

Urban forest (Trees within the town) ☐

Bushes ☐

Agroforestry farm ☐

Buffer zones of forest national park ☐

Gum Arabic plantation ☐

Communal forest or woodland ☐

Forest reserve ☐

Others, (Please specify) \_\_\_\_\_

13. Of the above sources, which source do you prefer most to haul fuelwood \_\_\_\_\_ and why? \_\_\_\_\_

14. Do you obtain a license/permit before harvesting trees for fuelwood?

Yes ☐ how much is the permit fee ₦ \_\_\_\_\_ an from who? \_\_\_\_\_

No ☐ Why? \_\_\_\_\_

15. What quantity do you typically Transport? \_\_\_\_\_ (Kg/ton/Truck/month) and how many trips do you take per month? \_\_\_\_\_ (trip)

16. Please indicate the types of your fuelwood business ownership

Sole owner ☐ Family business ☐

Partnership ☐ Cooperative ☐

Other(s), please specify \_\_\_\_\_

17. Do you employ worker/s? Yes ☐ No ☐

18. If yes what is the total number of permanent worker you have? \_\_\_\_\_

19. Describe how you transport fuelwood? (e.g., roadside, village, city)

\_\_\_\_\_

20. How much is the average Transport fee for fuelwood?

From forest to Market ₦ \_\_\_\_\_

During mobile Trading ₦ \_\_\_\_\_ please state any other location of collection fuelwood and its destination \_\_\_\_\_

**21. What is your status as a fuelwood transporter?**

Own transport ☐

Hired transport ☐

Contracted transport ☐

**Others,** (Please specify) \_\_\_\_\_

**22. What type of transport do you own/drive/ride?**

Small size trucks (Pick up and Beijing Van) ☐

Medium size truck (Toyota Van and Bedford) ☐

Big truck/Lorry ☐

Rickshaw (Tricycle) ☐

Camel ☐

Ox-Cart ☐

Wheelbarrow ☐

Bicycle ☐

Headload ☐

Others (Please specify) \_\_\_\_\_

**23. What is the average hauling cost per truck or any fuelwood transporting means you are using ~~N~~**  
\_\_\_\_\_

**24. Do you vary the cost of fuelwood transportation in terms of categories of customers?**

Yes ☐ No ☐

**25. Who sets the hauling price for fuelwood?**

Transporters (self) ☐

Harvesters ☐

Wholesaler ☐

Retailers ☐

**Others,** (Please specify) \_\_\_\_\_

**26. Which form of fuelwood do you frequently transport?**

Bundles of twigs ☐

Stere of twigs ☐

Stere of cleaved woods ☐

Bundles of cleaved woods ☐

Stere of short Logs ☐

**Others** (Please specify) \_\_\_\_\_

**27. Which period is fuelwood more demanded?**

Dry season (November to March) ☐

Wet season (April to October) ☐

**28. Which period reflects a high price of fuelwood?**

Dry season (November to March) ☐

Wet season (April to October) ☐

**29. Who is/are your primary customer(s)?**

Households ☐

Institutions/small scale industries ☐

Harvesters ☐

Wholesaler ☐

Retailers ☐

**Others,** (Please specify) \_\_\_\_\_

SECTION C: COST INFORMATION

30. List average monthly expenses related to your fuelwood transport activities.

| Types of Cost (please detail out each related cost) | Units<br>(Litters) | ₦ | Per month/year | Purchase price<br>₦ | Year bought |
|-----------------------------------------------------|--------------------|---|----------------|---------------------|-------------|
| Variable cost                                       |                    |   |                |                     |             |
| Fuel                                                |                    |   |                |                     |             |
| Maintenance                                         |                    |   |                |                     |             |
| Labor.                                              |                    |   |                |                     |             |
| Tax                                                 |                    |   |                |                     |             |
| Labor                                               |                    |   |                |                     |             |
| Others, (Please specify)                            |                    |   |                |                     |             |
|                                                     |                    |   |                |                     |             |
| Fixed cost                                          |                    |   |                |                     |             |
| Insurance                                           |                    |   |                |                     |             |
| Tax                                                 |                    |   |                |                     |             |
| Interest expense                                    |                    |   |                |                     |             |
| Big truck/Lorry                                     |                    |   |                |                     |             |
| Medium size truck (Toyota Van and Bedford)          |                    |   |                |                     |             |
| Rickshaw (Tricycle)                                 |                    |   |                |                     |             |
| Camel                                               |                    |   |                |                     |             |
| Ox-Cart                                             |                    |   |                |                     |             |
| Wheelbarrow                                         |                    |   |                |                     |             |
| Bicycle                                             |                    |   |                |                     |             |
| Others, (Please specify)                            |                    |   |                |                     |             |
|                                                     |                    |   |                |                     |             |
|                                                     |                    |   |                |                     |             |

31. What is the cost for contracting truck by harvesters (per truck/stere) ₦ \_\_

## SECTION D: ENVIRONMENTAL ASPECTS

32. How do you load fuelwood into the Truck?

Manually (Hand carrying)

☐

Mechanically (Loader Truck)

☐

Others, (Please specify \_\_\_\_\_)

33. How do you off-load the fuelwood from Truck?

Manually (Hand carrying)

☐

Mechanically (Loader Truck)

☐

Others, (Please specify \_\_\_\_\_)

34. What form of trees do you Transport as fuelwood?

Only dead trees

☐

Any types of trees

☐

Others, (Please specify \_\_\_\_\_)

35. What form of fuelwood do you frequently Transport?

Log s

☐

Branches

☐

Stumps

☐

Others, (Please specify) \_\_\_\_\_

36. Is there any restriction by the forest department on the type of tree species you use to transport for fuelwood?

Yes

☐

No

☐

If yes, what are the names of those species \_\_\_\_\_?

37. Is there any restriction by any other institution/organization on the type of tree species you use to transport as fuelwood?

Yes

☐

No

☐

If yes, what are the names of those methods \_\_\_\_\_?

38. What are your feelings about the availability of fuelwood from its source?

---



---



---

Use the below abbreviations to complete column D of Table 1

|                   |                  |                  |                               |                            |                                  |
|-------------------|------------------|------------------|-------------------------------|----------------------------|----------------------------------|
| Plantation<br>(P) | Roadside<br>(RS) | Farmland<br>(FL) | Shelter<br>belt Tree<br>(SBT) | Forest<br>reserve<br>(AFT) | Communal<br>forest area<br>(CFA) |
|-------------------|------------------|------------------|-------------------------------|----------------------------|----------------------------------|

Table 1:

39. Please fill the information in the three columns of the table where applicable

| S/n   | A                            | B                              | D                                                                       | E                                           |
|-------|------------------------------|--------------------------------|-------------------------------------------------------------------------|---------------------------------------------|
|       | Common/Local<br>name (Hausa) | Botanical Name                 | Mark (X) the<br>preferred tree<br>species for<br>commercial<br>fuelwood | Common place where<br>tree species is found |
| i.    | <i>Dakwara</i>               | <i>Acacia Senegal</i>          |                                                                         |                                             |
| ii.   | <i>Farar kaya</i>            | <i>Acacia seyal</i>            |                                                                         |                                             |
| iii.  | <i>Bagaruwa</i>              | <i>Acacia nilotica</i>         |                                                                         |                                             |
| iv.   | <i>Gawo</i>                  | <i>Faidherbia albida</i>       |                                                                         |                                             |
| v.    | <i>Kandili</i>               | <i>Acacia tortilis</i>         |                                                                         |                                             |
| vi.   | <i>Marke</i>                 | <i>Anogeissus leiocarpa</i>    |                                                                         |                                             |
| vii.  | <i>Matsagi</i>               | <i>Bauhinia rufescens</i>      |                                                                         |                                             |
| viii. | <i>Aduwa</i>                 | <i>Balanites aegyptiaca</i>    |                                                                         |                                             |
| ix.   | <i>Kurya</i>                 | <i>Bombax costatum</i>         |                                                                         |                                             |
| x.    | <i>Kadanyar Rafi</i>         | <i>Breonadia salicina</i>      |                                                                         |                                             |
| xi.   | <i>Kadanya</i>               | <i>Vitellaria paradoxa</i>     |                                                                         |                                             |
| xii.  | <i>Rimi</i>                  | <i>Ceiba pentandra</i>         |                                                                         |                                             |
| xiii. | <i>Maje</i>                  | <i>Daniellia oliveri</i>       |                                                                         |                                             |
| xiv.  | <i>Taura</i>                 | <i>Deuterium microcarpum</i>   |                                                                         |                                             |
| xv.   | <i>Kanya</i>                 | <i>Diospyros mespiliformis</i> |                                                                         |                                             |

|        |         |                                    |  |  |
|--------|---------|------------------------------------|--|--|
| xvi.   | Baure   | <i>Ficus syscomorus</i>            |  |  |
| xvii.  | Goruba  | <i>Hyphaene thebaica</i> (big)     |  |  |
| xviii. | Dorowa  | <i>Parkia biglobosa</i>            |  |  |
|        | Kalgo   | <i>Piliostigma reticulatum</i>     |  |  |
| xix.   | Kirya   | <i>Prosopis africana</i>           |  |  |
| xx.    | Sanya   | <i>Securidaca longepedunculata</i> |  |  |
| xxi.   | Danya   | <i>Sclerocarya birrea</i>          |  |  |
| xxii.  | Tsamiya | <i>Tamarindus indica</i>           |  |  |
| xxiii. | Dinya   | <i>Vitex doniana</i>               |  |  |
| xxiv.  | Tsada   | <i>Xmenia americana</i>            |  |  |
| xxv.   | Magarya | <i>Ziziphus mauritiana</i>         |  |  |
| xxvi.  | Kurna   | <i>Ziziphus mucronata</i>          |  |  |

40. Have you noticed any species that is difficult to obtain now compared to the previous period?

Yes

☐

No

☐

If yes, name the species \_\_\_\_\_ and why do you think this happen\_\_\_\_\_

41. Is the fuelwood supply from the source uniform over the years

Yes

☐

No

☐

If No; please why? \_\_\_\_\_ (e.g. seasonality)

42. Do you make any tree-planting efforts in the forest, rural areas, or urban area?

Yes

☐

No

☐

If yes, Where? \_\_\_\_\_

If no, Why \_\_\_\_\_

## SECTION E: CHALLENGES AND INTERVENTION STRATEGIES

43. What are your main challenges while undertaking your fuelwood operation?

i. \_\_\_\_\_

ii. \_\_\_\_\_

iii. \_\_\_\_\_

44. What do you think should be done to improve the situation stated above?

i. \_\_\_\_\_

ii. \_\_\_\_\_

iii. \_\_\_\_\_

45. Do you get any support from the government?

Yes ☐

No ☐

If yes, state the type of support?

i. \_\_\_\_\_

If no, why?

i. \_\_\_\_\_

46. Do you get any support from any organization or institution?

Yes ☐

No ☐

If yes, which organization/institution?

i. \_\_\_\_\_

ii. What type of support?

\_\_\_\_\_

47. Are you willing to plant?

---

48. If yes, what assistance do you require if you are willing to plant a tree?

---

## Questionnaire of Fuelwood Vendors (Wholesalers and Retailers)

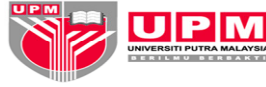

I am a PhD. Student from University Putra Malaysia (UPM) currently undertaking a study titled '**ANALYSIS OF FUELWOOD VALUE CHAIN IN YOBE STATE, NIGERIA**'

. Therefore, soliciting for your support and time to respond to the attached questionnaire. The content of the questionnaire is centred on the below sub-themes:

\_\_\_\_\_ A Socio-demographic Background

\_\_\_\_\_ B: Structure and characteristics of fuelwood value chain

\_\_\_\_\_ C: Market analysis/cost

\_\_\_\_\_ D: Environmental aspects of fuelwood

\_\_\_\_\_ E: Problem faced, change expectations and interventions in fuelwood value chain

### SECTION A: SOCIO-DEMOGRAPHIC PROFILE

Name (Optional) \_\_\_\_\_

1. Gender:      Male                      ☐ Female                      ☐

2. Marital status: Single                      ☐ Married                      ☐

3. Age: \_\_\_\_\_ years

**4. Highest Education Level:**

- 1. Tertiary (Dip/NCE/HND/Degree/Masters/PhD) ☐
- 2. Secondary (JCE/SSCE) ☐
- 3. Primary ☐
- 4. Non-formal education ☐

**5. Household size:** \_\_\_\_\_ **person(s)**

**6. Are you currently registered with any fuelwood association?**

Yes ☐ No ☐

**7. What is your status in your fuelwood business?**

- 3. Self-employed ☐
- 4. Employee ☐

**8. What is the status of your employment?**

Full time ☐ Part time ☐ Seasonal ☐

**9. If your status is a part time or seasonal, what is your main occupation?** \_\_\_\_\_

**10. How long have you been working as fuelwood collector/harvester?** \_\_\_\_\_

**11. Where do you currently live?** \_\_\_\_\_ (name of village and city)

**12. On average, how much investment capital do you start with ₦ \_\_\_\_\_ and how much do you earn from this (fuelwood collection/harvesting) job?**  
₦ \_\_\_\_\_/month

## SECTION B: STRUCTURE AND NODES OF FUELWOOD VALUE CHAIN

13. From the following sources of fuelwood, please indicate the fuelwood harvest/collection often source fuelwood or being contracted to haul fuelwood?

|                                      |                          |
|--------------------------------------|--------------------------|
| Urban forest (Trees within the town) | <input type="checkbox"/> |
| Bushes                               | <input type="checkbox"/> |
| Agroforestry farm                    | <input type="checkbox"/> |
| Buffer zones of forest national park | <input type="checkbox"/> |
| Gum Arabic plantation                | <input type="checkbox"/> |
| Communal forest or woodland          | <input type="checkbox"/> |
| Forest reserve                       | <input type="checkbox"/> |
| Others, (Please specify) _____       |                          |

14. Of the above sources, which source do you mostly order/buy your fuelwood and why?

\_\_\_\_\_

15. Do you obtain a license/permit for fuelwood trading?

Yes ☐ How much do you pay per month and From who? \_\_\_\_\_

No ☐ Why? \_\_\_\_\_

16. What volume/quantity of fuelwood do you typically sell? \_\_\_\_\_ (Tonne or Kg/month)

17. Please indicate the types of your fuelwood business ownership

Sole owner ☐ Family business ☐  
Partnership ☐ Cooperative ☐ Group or organization ☐  
Other(s), please specify \_\_\_\_\_

18. Do you employ a worker? Yes ☐ No ☐

19. If yes what is the total number of permanent worker you have? \_\_\_\_\_

20. Describe how you sell your fuelwood? (e.g., roadside, village, city)

\_\_\_\_\_

**21. How much do you sell?**

Sold at roadside ₦ \_\_\_\_\_

Sold at market ₦ \_\_\_\_\_ please state the location of the market \_\_\_\_\_

Sold at other place (Specify the amount and place) ₦ \_\_\_\_\_

**22. How is your fuelwood being convey to the fuelwood market?**

Own transport ☐

☐

Hired transport

☐

Contracted transport

**Others,** (Please specify) \_\_\_\_\_

**23. What type of transport do you use to convey your fuelwood?**

Small size truck (Pick-up, Hilux, etc.) ☐

Medium size (Canter) ☐

Big truck/Lorry ☐

Rickshaw (Tricycle) ☐

Camel ☐

Ox-Cart ☐

Wheelbarrow ☐

Bicycle ☐

Headload ☐

**Others** (Please specify) \_\_\_\_\_

**24. Do you vary fuelwood prices in terms of categories of buyers?**

Yes ☐ No ☐

**25. Who sets the price for fuelwood?**

Wholesaler ☐

Retailers ☐

Transporters ☐

Harvesters ☐

Consumers ☐

**Others,** (Please specify) ☐

**26. In what form do you sell the extracted fuelwood?**

Bundles of twigs ☐

Stere of twigs ☐

Stere of cleaved woods ☐

Bundles of cleaved woods ☐

Stere of short Logs ☐

**Others** (Please specify) \_\_\_\_\_

**27. Which period is fuelwood more demanded?**

Dry season (November to March) ☐

Wet season (April to October) ☐

**28. Which period reflects a high price of fuelwood?**

Dry season (November to March) ☐

Wet season (April to October) ☐

**29. Who is/are your primary customer(s)?**

Households ☐

Institutions/small scale industries ☐

Transporters ☐

Retailers ☐

Wholesalers ☐

All ☐

**Others,** (Please specify) \_\_\_\_\_

## SECTION C: COST INFORMATION

30. Average monthly expenses, please mark where applicable and add if necessary

| S/n                          | Units                                | Cost/unit | Total costs |
|------------------------------|--------------------------------------|-----------|-------------|
| Variables                    | [Litters,<br>Kilograms/Naira<br>(₦)] | (₦)       | (₦)         |
| Fuel                         |                                      |           |             |
| Maintenance                  |                                      |           |             |
| Labor                        |                                      |           |             |
| Forest royalty               |                                      |           |             |
| Illegal charges (if any)     |                                      |           |             |
| Fuelwood cost                |                                      |           |             |
| Local government tax         |                                      |           |             |
| State government tax         |                                      |           |             |
| Forest community council fee |                                      |           |             |
| Rent                         |                                      |           |             |
| Security                     |                                      |           |             |
| Others (Please specify)      |                                      |           |             |
|                              |                                      |           |             |
|                              |                                      |           |             |

31. At what price do you buy the above selected transport/conveying means loaded with fuelwood?

₦ \_\_\_\_\_

**SECTION D: ENVIRONMENTAL ASPECTS OF FUELWOOD VALUE CHAIN (30-38)**

**32. How do you carryout fuelwood trading related activities (Weighing, Bundling, loading etc.)?**

Manually (Hand collection method, Machete, Ax, Digger) ☐

Mechanically (weighing balance, machine) ☐

**Others**, (Please specify \_\_\_\_\_)

.

**33. What type of trees do you sell as fuelwood?**

Fuelwood obtained from dead standing trees ☐

Fuelwood obtained from diseased and forked trees ☐

Fuelwood obtained from dead fallen trees ☐

**Others**, (Please specify \_\_\_\_\_)

**34. What type of trees is supplied to you as fuelwood?**

Parts of dead trees only ☐

Combination of dry and non-dried parts of trees ☐

**Any Others**, (Please specify) \_\_\_\_\_

**35. What form of tree do you primarily sell as fuelwood?**

Logs ☐

Twigs ☐

Stumps ☐

**Others**, (Please specify) \_\_\_\_\_

**36. Is there any restriction by the forest department on the type of tree species to be supplied as fuelwood to vendors?**

Yes ☐

No ☐

If yes, what are thoses species? \_\_\_\_\_

**37. Is there any restriction by the forest department on the forms of fuelwood allowed to be supplied and sold of Tree species?**

Yes ☐

No ☐

If yes, what are those form of trees? \_\_\_\_\_

**38. What are your feelings about the availability of fuelwood from its source?**

Use the below abbreviations to complete column D of Table 1

|                   |                  |                  |                               |                            |                                  |
|-------------------|------------------|------------------|-------------------------------|----------------------------|----------------------------------|
| Plantation<br>(P) | Roadside<br>(RS) | Farmland<br>(FL) | Shelter<br>belt Tree<br>(SBT) | Forest<br>reserve<br>(AFT) | Communal<br>forest area<br>(CFA) |
|-------------------|------------------|------------------|-------------------------------|----------------------------|----------------------------------|

Table 1:

39. Please fill the information in the three columns of the table where applicable

| S/n    | A                         | B                                  | C                                       | D                                                           | E                                        |
|--------|---------------------------|------------------------------------|-----------------------------------------|-------------------------------------------------------------|------------------------------------------|
|        | Common/Local name (Hausa) | Botanical Name                     | Types of Woods (Hard Wood or Soft Wood) | Mark (X) the preferred tree species for commercial fuelwood | Common place where tree species is found |
| i.     | Dakwara                   | <i>Acacia Senegal</i>              |                                         |                                                             |                                          |
| ii.    | Farar kaya                | <i>Acacia seyal</i>                |                                         |                                                             |                                          |
| iii.   | Bagaruwa                  | <i>Acacia nilotica</i>             |                                         |                                                             |                                          |
| iv.    | Gawo                      | <i>Faidherbia albida</i>           |                                         |                                                             |                                          |
| v.     | Kandili                   | <i>Acacia tortilis</i>             |                                         |                                                             |                                          |
| vi.    | Marke                     | <i>Anogeissus leiocarpa</i>        |                                         |                                                             |                                          |
| vii.   | Matsagi                   | <i>Bauhinia rufescens</i>          |                                         |                                                             |                                          |
| viii.  | Aduwa                     | <i>Balanites aegyptiaca</i>        |                                         |                                                             |                                          |
| ix.    | Kurya                     | <i>Bombax costatum</i>             |                                         |                                                             |                                          |
| x.     | Kadanya                   | <i>Vitellaria paradoxa</i>         |                                         |                                                             |                                          |
| xi.    | Rimi                      | <i>Ceiba pentandra</i>             |                                         |                                                             |                                          |
| xii.   | Maje                      | <i>Daniellia oliveri</i>           |                                         |                                                             |                                          |
| xiii.  | Taura                     | <i>Deuterium microcarpum</i>       |                                         |                                                             |                                          |
| xiv.   | Kanya                     | <i>Diospyros mespiliformis</i>     |                                         |                                                             |                                          |
| xv.    | Baure                     | <i>Ficus syscomorus</i>            |                                         |                                                             |                                          |
| xvi.   | Dorowa                    | <i>Parkia biglobosa</i>            |                                         |                                                             |                                          |
| xvii.  | Kalgo                     | <i>Piliostigma reticulatum</i>     |                                         |                                                             |                                          |
| xviii. | Kiry                      | <i>Prosopis africana</i>           |                                         |                                                             |                                          |
| xix.   | Sanya                     | <i>Securidaca longepedunculata</i> |                                         |                                                             |                                          |
| xx.    | Danya                     | <i>Sclerocarya birrea</i>          |                                         |                                                             |                                          |

|                                |         |                            |  |  |  |
|--------------------------------|---------|----------------------------|--|--|--|
| xxi.                           | Tsamiya | <i>Tamarindus indica</i>   |  |  |  |
| xxii.                          | Dinya   | <i>Vitex doniana</i>       |  |  |  |
| xxiii.                         | Tsada   | <i>Xmenia americana</i>    |  |  |  |
| xxiv.                          | Magarya | <i>Ziziphus mauritiana</i> |  |  |  |
| xxv.                           | Kurna   | <i>Ziziphus mucronata</i>  |  |  |  |
| Others, (Specify please) _____ |         |                            |  |  |  |

40. Have you noticed any species that is difficult to obtain now compared to the previous period?

Yes

☐

No

☐

If yes, name the species \_\_\_\_\_ and why do you think this happen \_\_\_\_\_

41. Is the fuelwood supply from the source uniform over the years

Yes

☐

No

☐

If No; please why? \_\_\_\_\_ (e.g. seasonality or demanded)

42. Do you make any tree-planting efforts in the forest, rural areas, or urban area?

Yes

☐

No

☐

If yes, Where? \_\_\_\_\_

If no, Why \_\_\_\_\_

## SECTION E: CHALLENGES AND INTERVENTION STRATEGIES

43. What are your main challenges while undertaking your fuelwood operation?

i. \_\_\_\_\_

ii. \_\_\_\_\_

iii. \_\_\_\_\_

44. What do you think should be done to improve the situation stated above?

i. \_\_\_\_\_

ii. \_\_\_\_\_

iii. \_\_\_\_\_

45. Do you get any support from the government?

Yes

☐

No

☐

If yes, state the type of support?

i. \_\_\_\_\_

If no, why?

i. \_\_\_\_\_

46. Do you get any support from any organization or institution?

Yes

☐

No

☐

If yes, which organization/institution?

i. \_\_\_\_\_

ii. What type of support? \_\_\_\_\_

47. Are you willing to plant?

\_\_\_\_\_

48. If yes, what assistance do you require if you are willing to plant trees?

---

Supplementary Materials 2  
Focus Group Discussions Guide

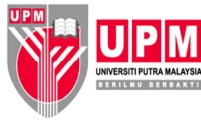

I am a PhD. Student from University Putra Malaysia (UPM), undertaking a study titled “Analysis of fuelwood value chain in Yobe state, Nigeria. Therefore, soliciting for your support and time to participate in the organized focus group discussion on the theme ‘***Social aspects of fuelwood value chain***’

I therefore assure you that:

*(1) All information given will be treated confidential*

*(2) This discussion is planned for a day in a scheduled venue and time (9:00am-3:30pm). During this time, we are to discuss on the subject matter with representatives of other relevant organizations, while the investigator remaining as moderator.*

*(3) Your participation in this research is voluntary.*

**Location** \_\_\_\_\_

**Date** \_\_\_\_\_

I want to explore and understand the issues that lie behind the social aspects of the fuelwood value chain and recommend developmental initiatives and actions that can create or improve a more excellent gender balance, control child labor and generally improve the social aspects of the fuelwood value chain.

## QUESTIONS

### 1. PARTICIPATION AND PRACTICES IN FUELWOOD COMMERCIALIZATION (GENDER AND AGE GROUPS)

- i. What is your perception of women's participation and representation in the fuelwood value chain?  
\_\_\_\_\_
- ii. Which of the income-generating activities in fuelwood value chain are typically performed by men?  
\_\_\_\_\_and Why?  
\_\_\_\_\_
- iii. Which of the income-generating activities in fuelwood value chain are mainly performed by women?  
\_\_\_\_\_and why?  
\_\_\_\_\_
- iv. What are your experiences on the obstacles to female participation/representation in all nodes of fuelwood value chain?  
\_\_\_\_\_

### 2. LAWS, POLICIES AND REGULATORY INSTITUTIONS

- i. To what extent do society's laws and values prevent discrimination of women in the commercialization of forest products such as fuelwood?  
\_\_\_\_\_

### 3. PROBLEMS/CHALLENGES AND INTERVENTIONS

#### A). PROBLEMS/CHALLENGES

- i. What do you think are the major problems that affect the social sustainability of the fuelwood value chain?  
\_\_\_\_\_

#### B). SUPPORT

- i. To what extent does the government provide Educational/awareness support to key actors in the fuelwood industry?  
\_\_\_\_\_
- ii. To what extent does the government provide financial support to key actors in the fuelwood industry?  
\_\_\_\_\_

iii. To what extent does the government provide entrepreneurial support to key actors in the fuelwood industry?

---

iv. To what extent do NGOs or other institutions provide Educational/awareness support to key actors in the fuelwood industry?

---

v. To what extent do NGOs, and institutions provide entrepreneurial support to key actors in the fuelwood industry?

---

vi. To what extent does g NGOs, and other institutions provide financial support?

---

vii. What Strategies/programs/support have any organization among these groups (government, private, public institutions, or NGO) rendered to any node of the fuelwood value chain?

---

#### **C). FUTURE INTERVENTIONS**

What do you like the government to do differently to support the participation of women across all supply chain and along all nodes of the fuelwood value chain (Please prioritize)?

---
